# Supplementary material
Source: MDPI journal article supplement (https://www.mdpi.com/2227-9717/10/4/780)

*Supplementary Information*

# Evaluation of Porcine and *Aspergillus oryzae* $\alpha$ -Amylases as Possible Model for the Human Enzyme

Mauro Marengo <sup>1</sup>, Davide Pezzilli <sup>1</sup>, Eleonora Gianquinto <sup>1</sup>, Alex Fissore<sup>1</sup>, Simonetta Oliaro-Bosso<sup>1</sup>, Barbara Sgorbini <sup>1</sup>, Francesca Spyrakis <sup>1,\*</sup> and Salvatore Adinolfi <sup>1,\*</sup>

Department of Drug Science and Technology, University of Turin, via Giuria 9, 10125 Turin, Italy; mauro.marengo@unito.it (M.M.); davide.pezzilli@edu.unito.it (D.P.); eleonora.gianquinto@unito.it (E.G.); alex.fissore@edu.unito.it (A.F.); simona.oliaro@unito.it (S.O.); barbara.sgorbini@unito.it (B.S.); francesca.spyrakis@unito.it (F.S.); salvatore.adinolfi@unito.it (S.A.).

\* Correspondence: francesca.spyrakis@unito.it (F.S.); salvatore.adinolfi@unito.it (S.A.); Tel.: +39-011-6707185 (F.S.); +39-011-6706862.

## Supplementary Information Content

**Figure S1:** Sequence alignment of HAS, PPA and AOA.

**Citation:** Marengo, M.; Pezzilli, D.; Gianquinto, E.; Fissore, A.; Oliaro-Bosso, S.; Sgorbini, B.; Spyrakis, F.; Adinolfi, S. Evaluation of Porcine and *Aspergillus oryzae*  $\alpha$ -Amylases as Possible Model for the Human Enzyme. *Processes* **2022**, *10*, 780. <https://doi.org/10.3390/pr10040780>

Academic Editor: Carla Silva

Received: 31 March 2022

Accepted: 12 April 2022

Published: 15 April 2022

**Publisher's Note:** MDPI stays neutral with regard to jurisdictional claims in published maps and institutional affiliations.

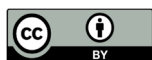

**Copyright:** © 2022 by the authors. Submitted for possible open access publication under the terms and conditions of the Creative Commons Attribution (CC BY) license (<https://creativecommons.org/licenses/by/4.0/>).

**Figure S1.** Sequence alignment of HAS, PPA and AOA. The same color identifies all conserved aminoacidic residues. The calcium binding site is highlighted in dark blue, the chloride binding site in dark red, and the catalytic triad in dark green.

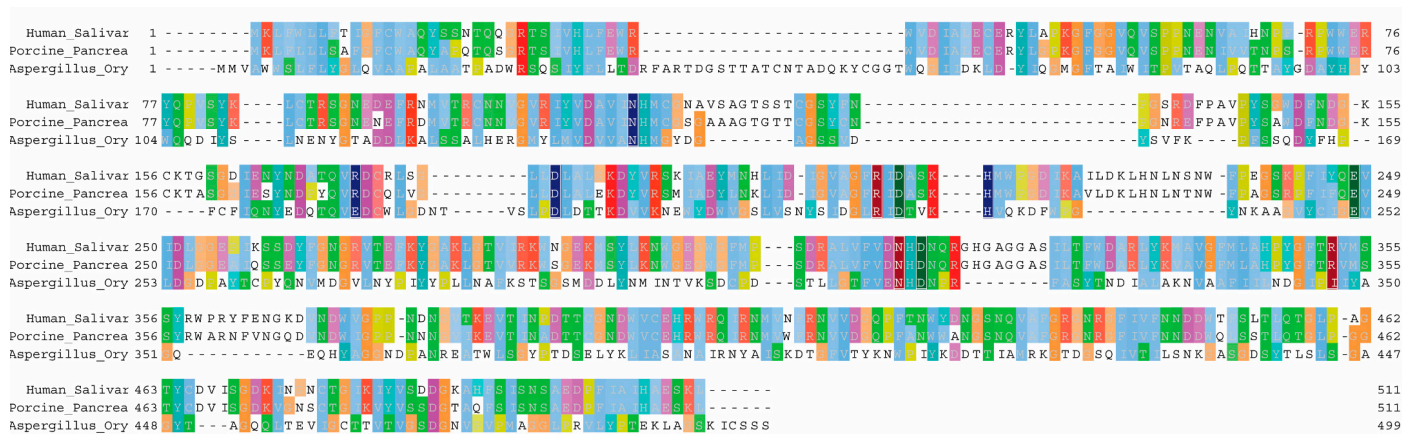

Supplement: s1 [file s1]
